# Supplementary material for: Copy number alterations in metastatic and early breast tumours: prognostic and acquired biomarkers of resistance to CDK4/6 inhibitors
Source: PubMed Central journal article supplement (PMC11405515; doi:10.1038/s41416-024-02804-6), 2024-08-02
Supplement: 41416_2024_2804_MOESM1_ESM.pdf [file 41416_2024_2804_MOESM1_ESM.pdf]

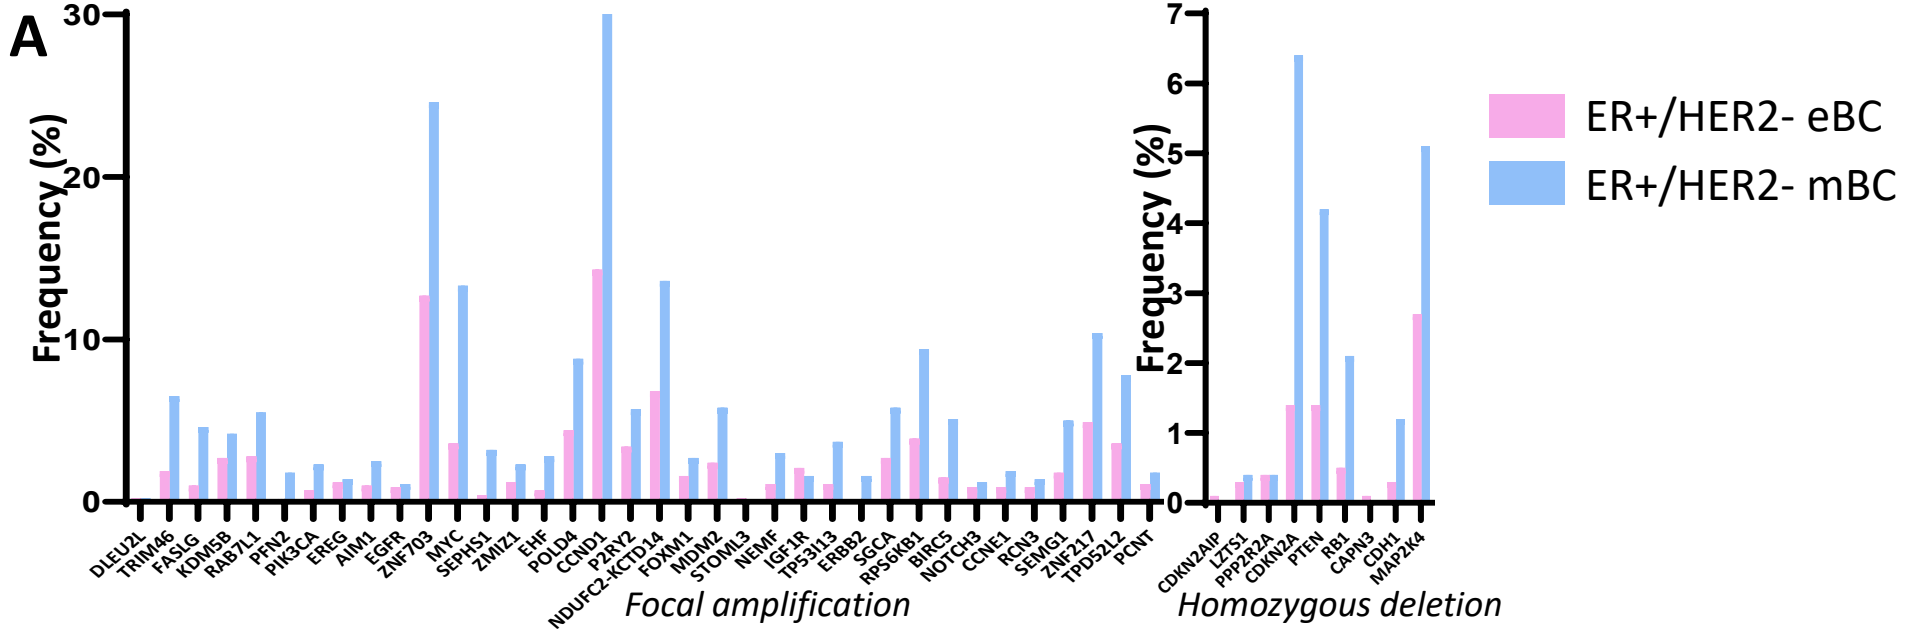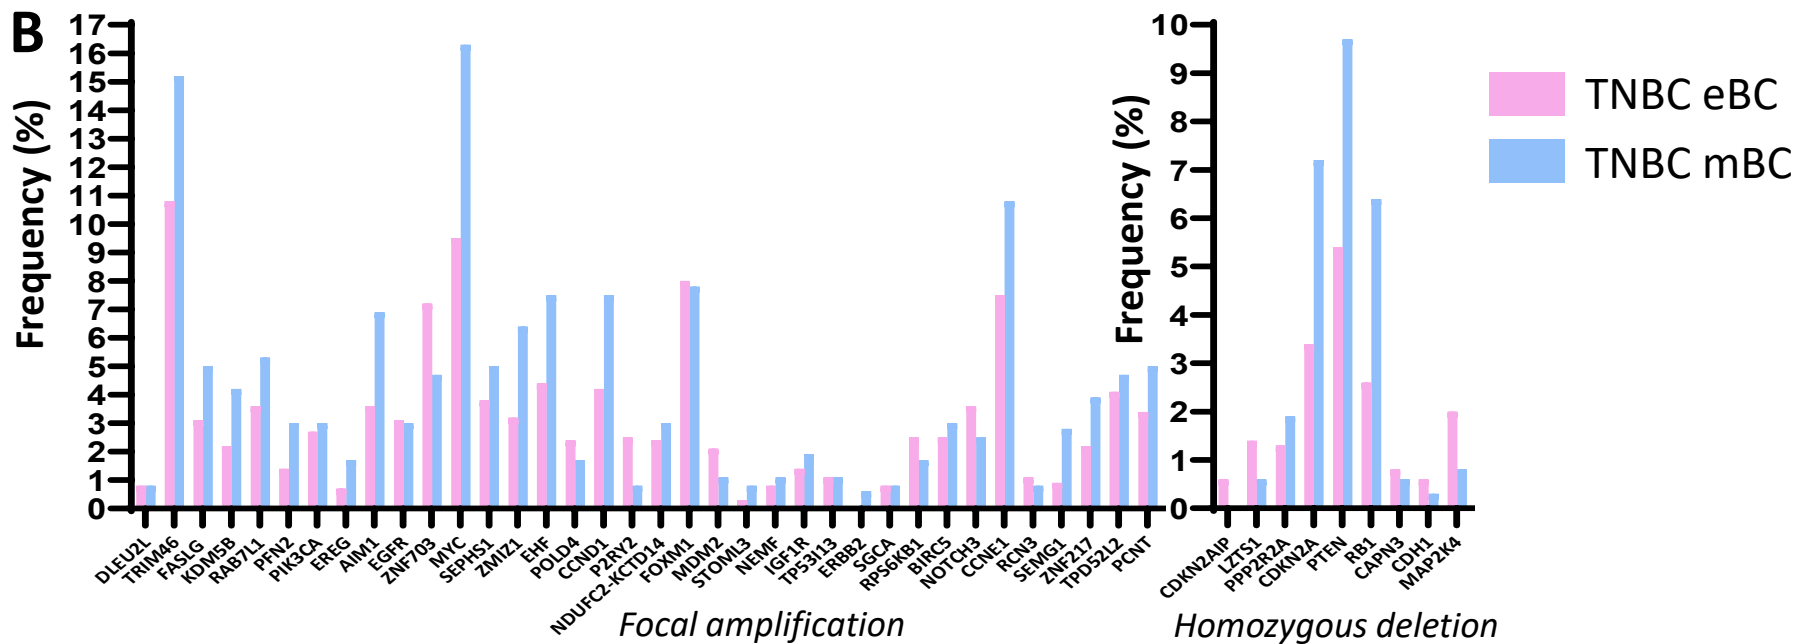

**Supplementary Figure 1**

Copy Number alterations (CNA) landscapes with focal amplifications and homozygous deletions. **A**, in ER+/HER2- eBC and ER+/HER2- mBC. **B**, in TNBC eBC and TNBC mBC.
