# Supplementary material for: Copy number alterations in metastatic and early breast tumours: prognostic and acquired biomarkers of resistance to CDK4/6 inhibitors
Source: PubMed Central journal article supplement (PMC11405515; doi:10.1038/s41416-024-02804-6), 2024-08-02
Supplement: 41416_2024_2804_MOESM2_ESM.pdf [file 41416_2024_2804_MOESM2_ESM.pdf]

**Supplementary Table 1.** Patients characteristics in ER+/HER2- and TNBC mBC populations.

| Characteristics                                                     | TNBC               | ER+/HER2-          |
|---------------------------------------------------------------------|--------------------|--------------------|
|                                                                     | (n = 361)<br>n (%) | (n = 565)<br>n (%) |
| <b>Age median (Q1-Q3)</b>                                           | 52 [43-61]         | 55 [47-64]         |
| <b>Histological grade</b>                                           |                    |                    |
| SBR1                                                                | 3 ( 0.9)           | 35 ( 6.6)          |
| SBR2                                                                | 60 ( 17.4)         | 283 ( 53.2)        |
| SBR3                                                                | 276 ( 80)          | 207 ( 38.9)        |
| SBR X (non gradable)                                                | 6 ( 1.7)           | 7 ( 1.3)           |
| Missing                                                             | 16                 | 33                 |
| <b>ECOG<sup>†</sup></b>                                             |                    |                    |
| ECOG 0                                                              | 214 ( 61.5)        | 259 ( 50.3)        |
| ECOG 1                                                              | 132 ( 37.9)        | 254 ( 49.3)        |
| ECOG 2                                                              | 2 ( 0.6)           | 2 ( 0.4)           |
| Missing                                                             | 13                 | 50                 |
| <b>Progesteron status</b>                                           |                    |                    |
| Negative                                                            | 361 (100)          | 135 ( 24.6)        |
| Positive                                                            | 0                  | 413 ( 75.4)        |
| Missing                                                             | 0                  | 17                 |
| <b>IHC subtype (primary diagnosis)</b>                              |                    |                    |
| ER+/HER2-                                                           | 0                  | 565 ( 100)         |
| TNBC                                                                | 361 ( 100)         | 0                  |
| <b>Number of metastatic sites (at screening)<br/>median (Q1-Q3)</b> | 2 (2-3)            | 3 (2-4)            |
| <b>Number of metastatic sites (categorical)</b>                     |                    |                    |
| 1-2                                                                 | 191 ( 53.7)        | 248 ( 45.2)        |
| 3-4                                                                 | 133 ( 37.4)        | 242 ( 44.1)        |
| >= 5                                                                | 32 ( 9)            | 59 ( 10.7)         |
| Missing                                                             | 5                  | 16                 |
| <b>Presence of liver metastasis</b>                                 |                    |                    |
| No                                                                  | 226 ( 63.5)        | 152 ( 27.7)        |
| Yes                                                                 | 130 ( 36.5)        | 397 ( 72.3)        |
| Missing                                                             | 5                  | 16                 |
| <b>Presence of lung metastasis</b>                                  |                    |                    |
| No                                                                  | 208 ( 58.4)        | 406 ( 74)          |
| Yes                                                                 | 148 ( 41.6)        | 143 ( 26)          |
| Missing                                                             | 5                  | 16                 |
| <b>Line of chemotherapy at screening</b>                            |                    |                    |
| First line                                                          | 353 ( 99.2)        | 522 ( 95.1)        |
| Second line                                                         | 3 ( 0.8)           | 27 ( 4.9)          |
| Missing                                                             | 5                  | 16                 |
| <b>Previous chemotherapy</b>                                        |                    |                    |
| No                                                                  | 104 ( 29.2)        | 149 ( 27.1)        |
| Yes                                                                 | 252 ( 70.8)        | 400 ( 72.9)        |
| Missing                                                             | 5                  | 16                 |
| <b>Previous adjuvant chemotherapy</b>                               |                    |                    |
| Anthracyclin + Other                                                | 26 ( 7.3)          | 56 ( 10)           |
| Anthracyclin based                                                  | 69 ( 19.4)         | 190 ( 33.9)        |
| No                                                                  | 228 ( 64.0)        | 276 ( 49.3)        |
| Other chemo/target                                                  | 33 ( 9.3)          | 38 ( 6.8)          |
| Missing                                                             | 5                  | 16                 |
| <b>Previous neoadjuvant chemotherapy</b>                            |                    |                    |
| Anthracyclin + Other                                                | 39 ( 11.0)         | 55 ( 10)           |
| Anthracyclin based                                                  | 103 ( 28.9)        | 184 ( 33.5)        |
| No                                                                  | 207 ( 58.1)        | 275 ( 50.1)        |
| Other chemo/target                                                  | 7 ( 2)             | 35 ( 6.4)          |
| Missing                                                             | 5                  | 16                 |
| <b>Previous hormoneotherapy</b>                                     |                    |                    |
| No                                                                  | 349 ( 98)          | 12 ( 2.2)          |
| Yes                                                                 | 7 ( 2)             | 537 ( 97.8)        |
| Missing                                                             | 5                  | 16                 |
| <b>Previous radiotherapy</b>                                        |                    |                    |
| No                                                                  | 118 ( 33.1)        | 71 ( 12.9)         |
| Yes                                                                 | 238 ( 66.9)        | 478 ( 87.1)        |
| Missing                                                             | 5                  | 16                 |
| <b>Overall survival</b>                                             |                    |                    |
| Alive                                                               | 111 ( 31.2)        | 251 ( 45.7)        |
| Death                                                               | 245 ( 68.8)        | 298 ( 54.3)        |
| Missing                                                             | 5                  | 16                 |
| <b>Follow-up (years) median (CI* 95%)</b>                           | 2.1 [2.0-2.4]      | 2.1 [2.1 - 2.3]    |

<sup>†</sup> ECOG: Eastern Cooperative Oncology Group  
Performance score

\* CI: confidence interval

**Supplementary Table 2.** Patient characteristics in ER+/HER2- and TNBC eBC populations.

| Characteristics                | Metabric                |                   | TCGA                   |                   | PACS04                 |    | Total                   |                   |
|--------------------------------|-------------------------|-------------------|------------------------|-------------------|------------------------|----|-------------------------|-------------------|
|                                | ER+/HER2-<br>(n = 1314) | TNBC<br>(n = 306) | ER+/HER2-<br>(n = 605) | TNBC<br>(n = 165) | ER+/HER2-<br>(n = 243) | NA | ER+/HER2-<br>(n = 2162) | TNBC<br>(n = 471) |
|                                | n (%)                   | n (%)             | n (%)                  | n (%)             | n (%)                  |    | n (%)                   | n (%)             |
| <b>Age (median)</b>            | 64.0                    | 53.7              | 59.0                   | 54.0              | 50.7                   |    | 61.0                    | 54.0              |
| <b>Menopause</b>               |                         |                   |                        |                   |                        |    |                         |                   |
| No                             | 196 (15.3)              | 104 (40.8)        | 122 (24.6)             | 34 (26.8)         | 0 (NaN)                |    | 318 (17.9)              | 138 (36.1)        |
| Yes                            | 1089 (84.7)             | 151 (59.2)        | 373 (75.4)             | 93 (73.2)         | 0 (NaN)                |    | 1462 (82.1)             | 244 (63.9)        |
| NA                             | 0                       | 0                 | 39                     | 11                | 243                    |    | 282                     | 11                |
| Missing                        | 29                      | 51                | 71                     | 27                | 0                      |    | 100                     | 78                |
| <b>Progesteron status</b>      |                         |                   |                        |                   |                        |    |                         |                   |
| Negative                       | 415 (32.3)              | 255 (100)         | 71 (13.3)              | 138 (100)         | 43 (18.8)              |    | 529 (25.9)              | 393 (100)         |
| Positive                       | 870 (67.7)              | 0 (0)             | 461 (86.7)             | 0 (0)             | 186 (81.2)             |    | 1517 (74.1)             |                   |
| Missing                        | 29                      | 51                | 73                     | 27                | 14                     |    | 116                     | 78                |
| <b>Histological grade</b>      |                         |                   |                        |                   |                        |    |                         |                   |
| 1                              | 147 (12)                | 6 (2.1)           | 0 (NaN)                | 0 (NaN)           | 39 (16.5)              |    | 186 (12.7)              | 6 (2.1)           |
| 2                              | 638 (52)                | 23 (9.1)          | 0 (NaN)                | 0 (NaN)           | 130 (55.1)             |    | 768 (52.5)              | 23 (9.1)          |
| 3                              | 442 (36)                | 230 (90.9)        | 0 (NaN)                | 0 (NaN)           | 67 (28.4)              |    | 509 (34.8)              | 230 (90.9)        |
| Missing                        | 87                      | 53                | 605                    | 165               | 7                      |    | 699                     | 218               |
| <b>T stage</b>                 |                         |                   |                        |                   |                        |    |                         |                   |
| T1 (T ≤ 2 cm)                  | 586 (46)                | 94 (37.0)         | 154 (28.8)             | 37 (26.8)         | 125 (51.7)             |    | 865 (42.2)              | 131 (33.4)        |
| T2 (2cm < T ≤ 5 cm)            | 633 (49.7)              | 143 (56.3)        | 293 (54.9)             | 85 (61.6)         | 105 (43.4)             |    | 1031 (50.3)             | 228 (58.2)        |
| T3 (T > 5 cm)                  | 55 (4.3)                | 17 (6.7)          | 87 (16.3)              | 16 (11.6)         | 12 (5)                 |    | 154 (7.5)               | 33 (8.6)          |
| NA                             | 11                      | 1                 | 0                      | 0                 | 1                      |    | 12                      | 1                 |
| Missing                        | 29                      | 51                | 71                     | 27                | 0                      |    | 100                     | 78                |
| <b>N stage</b>                 |                         |                   |                        |                   |                        |    |                         |                   |
| N0 (0)                         | 714 (55.6)              | 120 (47.1)        | 214 (46.4)             | 85 (66.9)         | 0 (0)                  |    | 928 (46.7)              | 205 (53.7)        |
| N1 (1-3)                       | 391 (30.4)              | 95 (37.3)         | 167 (36.2)             | 25 (19.7)         | 155 (63.8)             |    | 713 (35.8)              | 120 (31.4)        |
| N2 (4-9)                       | 134 (10.4)              | 21 (8.2)          | 49 (10.6)              | 12 (9.4)          | 65 (26.7)              |    | 248 (12.5)              | 33 (8.6)          |
| N3 (10+)                       | 46 (3.6)                | 19 (7.5)          | 31 (6.7)               | 5 (3.9)           | 23 (9.5)               |    | 100 (5)                 | 24 (6.3)          |
| Missing                        | 29                      | 51                | 144                    | 38                | 0                      |    | 173                     | 89                |
| <b>Previous hormonotherapy</b> |                         |                   |                        |                   |                        |    |                         |                   |
| No                             | 350 (27.2)              | 195 (76.5)        | 0 (NaN)                | 0 (NaN)           | 2 (0.8)                |    | 352 (23.1)              | 195 (76.5)        |
| Yes                            | 935 (72.8)              | 60 (23.5)         | 0 (NaN)                | 0 (NaN)           | 237 (99.2)             |    | 1172 (76.9)             | 60 (23.5)         |
| Missing                        | 29                      | 51                | 605                    | 165               | 4                      |    | 638                     | 216               |
| <b>Previous radiotherapy</b>   |                         |                   |                        |                   |                        |    |                         |                   |
| No                             | 546 (42.5)              | 72 (28.2)         | 194 (39.6)             | 53 (42.4)         | 7 (2.9)                |    | 747 (37)                | 125 (32.9)        |
| Yes                            | 739 (57.5)              | 183 (71.8)        | 296 (60.4)             | 72 (57.6)         | 236 (97.1)             |    | 1271 (63)               | 255 (67.1)        |
| Missing                        | 29                      | 51                | 115                    | 40                | 0                      |    | 144                     | 91                |
| <b>Overall survival</b>        |                         |                   |                        |                   |                        |    |                         |                   |
| 0                              | 537 (41.8)              | 117 (45.9)        | 484 (90.6)             | 117 (84.8)        | 204 (84)               |    | 1225 (59.4)             | 234 (59.5)        |
| 1                              | 748 (58.2)              | 138 (54.1)        | 50 (9.4)               | 21 (15.2)         | 39 (16)                |    | 837 (40.6)              | 159 (40.5)        |
| Missing                        | 29                      | 51                | 71                     | 27                | 0                      |    | 100                     | 78                |

Supplementary Table 3. Genomic alterations in the ER+/HER2- populations.

| Gene(s)                              | Chromosomal band | Location  | Status <sup>a</sup> | mBC (n = 565)<br>% <sup>b</sup> | TCGA (n = 605) |                          | Metabric (n = 1314)            |                | PACS04 (n = 243)         |                                |                |                          |                                |
|--------------------------------------|------------------|-----------|---------------------|---------------------------------|----------------|--------------------------|--------------------------------|----------------|--------------------------|--------------------------------|----------------|--------------------------|--------------------------------|
|                                      |                  |           |                     |                                 | % <sup>b</sup> | Raw p-value <sup>c</sup> | Corrected p-value <sup>d</sup> | % <sup>b</sup> | Raw p-value <sup>c</sup> | Corrected p-value <sup>d</sup> | % <sup>b</sup> | Raw p-value <sup>c</sup> | Corrected p-value <sup>d</sup> |
| <b>Know candidate genes (n = 45)</b> |                  |           |                     |                                 |                |                          |                                |                |                          |                                |                |                          |                                |
| <i>DLEU2L</i>                        | 1p31.3           | 64014588  | amp                 | 0,2                             | 0,3            | 1,00E+00                 | 1,00E+00                       | 0,2            | 1,00E+00                 | 1,00E+00                       | 0,0            | 1,00E+00                 | 1,00E+00                       |
| <i>TRIM46</i>                        | 1q22             | 155145873 | amp                 | 6,5                             | 1,8            | <b>8,53E-05</b>          | <b>4,68E-03</b>                | 2,1            | <b>3,05E-06</b>          | <b>5,98E-05</b>                | 1,6            | <b>6,20E-03</b>          | 1,17E-01                       |
| <i>FASLG (TNFSF18/TNFSF4)</i>        | 1q24.3           | 172628154 | amp                 | 4,6                             | 1,5            | <b>3,15E-03</b>          | 5,49E-02                       | 1,1            | <b>5,74E-06</b>          | <b>1,01E-04</b>                | 0,4            | <b>4,72E-03</b>          | 1,12E-01                       |
| <i>KDMSB</i>                         | 1q32.1           | 202696526 | amp                 | 4,2                             | 3,0            | 3,12E-01                 | 8,49E-01                       | 2,3            | <b>2,87E-02</b>          | 1,09E-01                       | 2,9            | <b>4,67E-01</b>          | 9,54E-01                       |
| <i>RAB7L1</i>                        | 1q32.1           | 205737114 | amp                 | 5,5                             | 2,3            | <b>7,63E-03</b>          | 1,05E-01                       | 2,5            | <b>1,80E-03</b>          | <b>1,25E-02</b>                | 3,7            | <b>3,71E-01</b>          | 9,02E-01                       |
| <i>PFN2</i>                          | 3q25.1           | 149682691 | amp                 | 1,8                             | 0,0            | <b>2,99E-03</b>          | 5,39E-02                       | 0,4            | <b>4,79E-03</b>          | <b>2,72E-02</b>                | 0,0            | <b>8,19E-02</b>          | 4,46E-01                       |
| <i>PIK3CA</i>                        | 3q26.32          | 178865902 | amp                 | 2,3                             | 1,2            | 2,00E-01                 | 6,92E-01                       | 0,2            | <b>2,56E-05</b>          | <b>3,71E-04</b>                | 0,8            | <b>2,53E-01</b>          | 7,22E-01                       |
| <i>EREG</i>                          | 4q13.3           | 75230860  | amp                 | 1,4                             | 1,3            | 1,00E+00                 | 1,00E+00                       | 0,9            | 4,66E-01                 | 8,05E-01                       | 1,2            | 1,00E+00                 | 1,00E+00                       |
| <i>AIM1</i>                          | 6q21             | 106959730 | amp                 | 2,5                             | 1,7            | 4,30E-01                 | 9,56E-01                       | 0,6            | <b>1,28E-03</b>          | <b>9,62E-03</b>                | 0,8            | <b>2,03E-01</b>          | 6,75E-01                       |
| <i>EGFR</i>                          | 7p11.2           | 55086714  | amp                 | 1,1                             | 0,7            | 6,70E-01                 | 1,00E+00                       | 0,5            | 3,34E-01                 | 6,53E-01                       | 1,6            | 7,33E-01                 | 1,00E+00                       |
| <i>ZNF703 (FGFR1)</i>                | 8p11.23          | 37553269  | amp                 | 24,6                            | 15,7           | <b>1,92E-04</b>          | <b>7,97E-03</b>                | 10,8           | <b>2,57E-14</b>          | <b>5,98E-12</b>                | 11,5           | <b>3,86E-05</b>          | <b>1,23E-02</b>                |
| <i>MYC</i>                           | 8q24.21          | 128747680 | amp                 | 13,3                            | 4,3            | <b>8,35E-08</b>          | <b>3,47E-05</b>                | 3,1            | <b>1,21E-16</b>          | <b>6,08E-14</b>                | 3,3            | <b>3,19E-05</b>          | <b>1,23E-02</b>                |
| <i>SEPHS1</i>                        | 10p13            | 13359424  | amp                 | 3,2                             | 0,7            | <b>3,06E-03</b>          | 5,41E-02                       | 0,6            | <b>3,05E-05</b>          | <b>4,30E-04</b>                | 0,0            | <b>1,06E-02</b>          | 1,43E-01                       |
| <i>ZMI21</i>                         | 10q22.3          | 80828792  | amp                 | 2,3                             | 1,7            | 5,57E-01                 | 1,00E+00                       | 1,2            | 1,23E-01                 | 3,30E-01                       | 0,8            | 2,53E-01                 | 7,22E-01                       |
| <i>EHF</i>                           | 11p13            | 34642640  | amp                 | 2,8                             | 0,8            | <b>1,82E-02</b>          | 1,79E-01                       | 0,8            | <b>9,38E-04</b>          | <b>7,42E-03</b>                | 0,4            | <b>5,35E-02</b>          | 3,59E-01                       |
| <i>PLD4</i>                          | 11q13.2          | 67118248  | amp                 | 8,8                             | 5,5            | <b>3,18E-02</b>          | 2,49E-01                       | 4,7            | <b>7,73E-04</b>          | <b>6,27E-03</b>                | 2,9            | <b>3,87E-03</b>          | 1,02E-01                       |
| <i>CNCD1</i>                         | 11q13.3          | 69455855  | amp                 | 30,1                            | 15,7           | <b>6,44E-09</b>          | <b>5,24E-06</b>                | 14,0           | <b>4,96E-16</b>          | <b>1,80E-13</b>                | 13,2           | <b>5,59E-07</b>          | <b>1,43E-03</b>                |
| <i>P2RY2</i>                         | 11q13.4          | 72929343  | amp                 | 5,7                             | 3,8            | 1,72E-01                 | 6,57E-01                       | 3,4            | <b>3,42E-02</b>          | 1,27E-01                       | 2,9            | <b>1,30E-01</b>          | 5,56E-01                       |
| <i>NDUFC2-KCTD14</i>                 | 11q14.1          | 77728017  | amp                 | 13,6                            | 6,0            | <b>1,40E-05</b>          | <b>1,50E-03</b>                | 6,7            | <b>1,76E-06</b>          | <b>3,88E-05</b>                | 7,8            | <b>2,63E-02</b>          | 2,41E-01                       |
| <i>FOXM1</i>                         | 12p13.33         | 2966847   | amp                 | 2,7                             | 2,0            | 5,69E-01                 | 1,00E+00                       | 1,9            | 3,89E-01                 | 7,40E-01                       | 0,8            | 1,63E-01                 | 6,16E-01                       |
| <i>MDM2</i>                          | 12q15            | 69201956  | amp                 | 5,8                             | 3,8            | 1,35E-01                 | 5,72E-01                       | 2,2            | <b>9,51E-05</b>          | <b>1,13E-03</b>                | 1,2            | <b>6,45E-03</b>          | 1,17E-01                       |
| <i>STOML3</i>                        | 13q13.3          | 39540062  | amp                 | 0,0                             | 0,3            | 5,09E-01                 | 9,95E-01                       | 0,2            | 8,76E-01                 | 1,00E+00                       | 0,0            | NA                       | NA                             |
| <i>NEMF</i>                          | 14q21.3          | 50249997  | amp                 | 3,0                             | 1,2            | <b>4,27E-02</b>          | 2,92E-01                       | 1,4            | <b>3,73E-02</b>          | 1,34E-01                       | 0,8            | <b>1,04E-01</b>          | 5,01E-01                       |
| <i>IGF1R</i>                         | 15q26.3          | 99192200  | amp                 | 1,6                             | 2,1            | 6,28E-01                 | 1,00E+00                       | 1,8            | 9,62E-01                 | 1,00E+00                       | 2,5            | 5,74E-01                 | 1,00E+00                       |
| <i>TP53I13</i>                       | 17q11.2          | 27893070  | amp                 | 3,7                             | 2,3            | 2,17E-01                 | 7,04E-01                       | 0,5            | <b>5,27E-07</b>          | <b>1,44E-05</b>                | 0,4            | <b>1,59E-02</b>          | 1,80E-01                       |
| <i>ERBB2</i>                         | 17q12            | 37844167  | amp                 | 1,6                             | 0,0            | <b>5,41E-03</b>          | 8,21E-02                       | 0,0            | <b>2,42E-05</b>          | <b>3,53E-04</b>                | 0,0            | <b>1,07E-01</b>          | 5,01E-01                       |
| <i>SGCA</i>                          | 17q21.33         | 48241575  | amp                 | 5,8                             | 3,8            | 1,35E-01                 | 5,72E-01                       | 2,5            | <b>5,44E-04</b>          | <b>4,96E-03</b>                | 1,6            | <b>1,50E-02</b>          | 1,74E-01                       |
| <i>RPS6KB1</i>                       | 17q23.1          | 57970447  | amp                 | 9,4                             | 6,0            | <b>3,56E-02</b>          | 2,54E-01                       | 3,4            | <b>1,87E-07</b>          | <b>6,23E-06</b>                | 2,5            | <b>9,15E-04</b>          | 5,70E-02                       |
| <i>BIRC5</i>                         | 17q25.3          | 76210267  | amp                 | 5,1                             | 2,0            | <b>5,64E-03</b>          | 8,50E-02                       | 1,6            | <b>2,56E-05</b>          | <b>3,71E-04</b>                | 0,8            | <b>6,43E-03</b>          | 1,17E-01                       |
| <i>NOTCH3</i>                        | 19p13.12         | 15270444  | amp                 | 1,2                             | 1,3            | 1,00E+00                 | 1,00E+00                       | 1,1            | 9,29E-01                 | 1,00E+00                       | 0,4            | 4,83E-01                 | 9,60E-01                       |
| <i>CNCE1</i>                         | 19q12            | 30302805  | amp                 | 1,9                             | 1,5            | 7,04E-01                 | 1,00E+00                       | 0,8            | 6,92E-02                 | 2,09E-01                       | 0,4            | 1,81E-01                 | 6,16E-01                       |
| <i>RCN3</i>                          | 19q13.33         | 50030875  | amp                 | 1,4                             | 0,8            | 4,95E-01                 | 9,95E-01                       | 1,4            | 1,00E+00                 | 1,00E+00                       | 0,4            | 3,78E-01                 | 9,02E-01                       |
| <i>SEMG1</i>                         | 20q13.12         | 43835638  | amp                 | 5,0                             | 2,5            | <b>3,62E-02</b>          | 2,55E-01                       | 1,3            | <b>4,30E-06</b>          | <b>7,93E-05</b>                | 1,6            | <b>4,39E-02</b>          | 3,25E-01                       |
| <i>ZNF217</i>                        | 20q13.2          | 52183604  | amp                 | 10,4                            | 6,6            | <b>2,46E-02</b>          | 2,18E-01                       | 4,3            | <b>5,16E-07</b>          | <b>1,42E-05</b>                | 3,7            | <b>2,48E-03</b>          | 8,59E-02                       |
| <i>TPD52L2</i>                       | 20q13.33         | 62496596  | amp                 | 7,8                             | 5,0            | 6,20E-02                 | 3,53E-01                       | 3,0            | <b>5,63E-06</b>          | <b>1,00E-04</b>                | 2,9            | <b>1,34E-02</b>          | 1,62E-01                       |
| <i>PCNT</i>                          | 21q22.3          | 47744036  | amp                 | 1,8                             | 1,5            | 8,81E-01                 | 1,00E+00                       | 0,9            | 1,77E-01                 | 4,17E-01                       | 0,8            | 4,82E-01                 | 9,60E-01                       |
| <i>CDKN2AIP</i>                      | 4q35.1           | 184365744 | del                 | 0,0                             | 0,2            | 1,00E+00                 | 1,00E+00                       | 0,1            | 1,00E+00                 | 1,00E+00                       | 0,0            | NA                       | NA                             |
| <i>LZTS1</i>                         | 8p21.3           | 20103676  | del                 | 0,4                             | 0,7            | 7,45E-01                 | 1,00E+00                       | 0,2            | 1,00E+00                 | 1,00E+00                       | 0,0            | 8,75E-01                 | 1,00E+00                       |
| <i>PPP2R2A</i>                       | 8p21.2           | 26149007  | del                 | 0,4                             | 0,5            | 1,00E+00                 | 1,00E+00                       | 0,3            | 1,00E+00                 | 1,00E+00                       | 0,4            | 1,00E+00                 | 1,00E+00                       |
| <i>CDKN2A</i>                        | 9p21.3           | 21967751  | del                 | 6,4                             | 2,0            | <b>2,79E-04</b>          | <b>8,47E-03</b>                | 0,8            | <b>5,84E-12</b>          | <b>2,73E-10</b>                | 1,2            | <b>3,23E-03</b>          | 1,10E-01                       |
| <i>PTEN</i>                          | 10q23.31         | 89622870  | del                 | 4,2                             | 1,5            | <b>7,52E-03</b>          | 1,44E-01                       | 1,4            | <b>2,16E-04</b>          | <b>3,55E-03</b>                | 1,2            | <b>4,86E-02</b>          | 7,97E-01                       |
| <i>RB1</i>                           | 13q14.2          | 48877887  | del                 | 2,1                             | 0,7            | 5,73E-02                 | 7,65E-01                       | 0,3            | <b>2,50E-04</b>          | <b>4,08E-03</b>                | 0,4            | <b>1,42E-01</b>          | 1,00E+00                       |
| <i>CAPN3</i>                         | 15q15.1          | 42640301  | del                 | 0,0                             | 0,2            | 1,00E+00                 | 1,00E+00                       | 0,0            | NA                       | NA                             | 0,0            | NA                       | NA                             |
| <i>CDH1</i>                          | 16q22.1          | 68771128  | del                 | 1,2                             | 0,2            | 6,12E-02                 | 7,65E-01                       | 0,2            | <b>1,57E-02</b>          | 1,55E-01                       | 0,4            | <b>4,83E-01</b>          | 1,00E+00                       |
| <i>MAR2K4</i>                        | 17p12            | 11924141  | del                 | 5,1                             | 2,6            | <b>3,95E-02</b>          | 5,57E-01                       | 1,8            | <b>7,97E-05</b>          | <b>1,41E-03</b>                | 3,7            | <b>4,85E-01</b>          | 1,00E+00                       |
| <b>New discovered genes</b>          |                  |           |                     |                                 |                |                          |                                |                |                          |                                |                |                          |                                |
| <i>GJC2</i>                          | 1q42.13          | 228337553 | Amp                 | 5,0                             | 0,5            | <b>5,01E-06</b>          | <b>7,29E-04</b>                | 1,0            | <b>1,75E-07</b>          | <b>5,89E-06</b>                | 0,4            | <b>2,90E-03</b>          | 9,26E-02                       |
| <i>TERT</i>                          | 5p15.33          | 1253262   | Amp                 | 5,8                             | 1,8            | <b>5,40E-04</b>          | <b>1,55E-02</b>                | 1,4            | <b>2,32E-07</b>          | <b>7,31E-06</b>                | 0,0            | <b>2,59E-04</b>          | <b>3,47E-02</b>                |
| <i>RAD21</i>                         | 8q24.11          | 117858174 | Amp                 | 14,0                            | 4,5            | <b>2,59E-08</b>          | <b>1,58E-05</b>                | 2,2            | <b>2,57E-23</b>          | <b>1,26E-19</b>                | 5,3            | <b>6,22E-04</b>          | <b>4,79E-02</b>                |
| <i>ST3GAL1 (NDRG1/WISP1)</i>         | 8q24.22          | 134467091 | Amp                 | 9,4                             | 2,5            | <b>8,80E-07</b>          | <b>1,85E-04</b>                | 2,0            | <b>5,77E-13</b>          | <b>1,14E-10</b>                | 2,5            | <b>9,15E-04</b>          | 5,70E-02                       |
| <i>SOC1</i>                          | 16p13.13         | 11348262  | Amp                 | 4,1                             | 1,0            | <b>1,39E-03</b>          | <b>3,07E-02</b>                | 1,0            | <b>1,83E-05</b>          | <b>2,76E-04</b>                | 0,0            | <b>3,07E-03</b>          | 9,39E-02                       |

<sup>a</sup>: Amp : Focal amplification; Del : Homozygous deletion

<sup>b</sup>: Percentage of genomic alterations

<sup>c</sup>: Chi-squared test : TCGA (or Metabric or PACS04) versus mBC ; genes and p-values in bold are significant

<sup>d</sup>: Corrected Chi-squared test : TCGA (or Metabric or PACS04) versus mBC ; genes and p-values in bold are significant

NA: Not Applicable. Frequencies at 0% in both populations (mBC and eBC)

Supplementary Table 4. Prognostic effect of copy number alterations in the ER+/HER2- mBC population.

| Gene(s)                       | Chromosomal band | Location  | Status <sup>a</sup> | Univariate (OS)      |                   | Multivariate (OS)        |                                |
|-------------------------------|------------------|-----------|---------------------|----------------------|-------------------|--------------------------|--------------------------------|
|                               |                  |           |                     | p-value <sup>b</sup> | HR (95% CI)       | Raw p-value <sup>b</sup> | Corrected p-value <sup>b</sup> |
| <i>TRIM46</i>                 | 1q22             | 155145873 | Amp                 | 0,38                 | 1.0 [ 0.5 ; 1.7 ] | 0,16                     | 1.00                           |
| <i>FASLG (TNFSF18/TNFSF4)</i> | 1q24.3           | 172628154 | Amp                 | 0,49                 | 0.7 [ 0.3 ; 1.4 ] | 0,3                      | 1.00                           |
| <i>ZNF703 (FGFR1)</i>         | 8p11.23          | 37553269  | Amp                 | 0,09                 | 1.3 [ 1.0 ; 1.7 ] | 0,09                     | 1.00                           |
| <i>MYC</i>                    | 8q24.21          | 128747680 | Amp                 | <b>0,02</b>          | 1.5 [ 1.0 ; 2.3 ] | <b>0,03</b>              | 0,53                           |
| <i>SEPHS1</i>                 | 10p13            | 13359424  | Amp                 | 0,55                 | 0.8 [ 0.4 ; 1.6 ] | 0,46                     | 1.00                           |
| <i>POLD4</i>                  | 11q13.2          | 67118248  | Amp                 | 0,96                 | 1.1 [ 0.7 ; 1.7 ] | 0,98                     | 1.00                           |
| <i>CCND1</i>                  | 11q13.3          | 69455855  | Amp                 | 0,57                 | 1.1 [ 0.8 ; 1.4 ] | 0,75                     | 1.00                           |
| <i>NDUFC2-KCTD14</i>          | 11q14.1          | 77728017  | Amp                 | 0,85                 | 0.8 [ 0.4 ; 1.3 ] | 0,84                     | 1.00                           |
| <i>RPS6KB1</i>                | 17q23.1          | 57970447  | Amp                 | 0,38                 | 0.8 [ 0.5 ; 1.2 ] | 0,25                     | 1.00                           |
| <i>BIRC5</i>                  | 17q25.3          | 76210267  | Amp                 | 0,86                 | 1.2 [ 0.6 ; 2.1 ] | 0,72                     | 1.00                           |
| <i>SEMG1</i>                  | 20q13.12         | 43835638  | Amp                 | 0,64                 | 1.0 [ 0.5 ; 1.9 ] | 0,92                     | 1.00                           |
| <i>ZNF217</i>                 | 20q13.2          | 52183604  | Amp                 | 0,84                 | 1.2 [ 0.8 ; 1.8 ] | 0,79                     | 1.00                           |
| <i>CDKN2A</i>                 | 9p21.3           | 21967751  | Del                 | 0,22                 | 1.2 [ 0.8 ; 1.9 ] | 0,17                     | 1.00                           |
| <i>PTEN</i>                   | 10q23.31         | 89622870  | Del                 | 0,22                 | 1.5 [ 0.9 ; 2.5 ] | 0,13                     | 1.00                           |
| <i>GJC2</i>                   | 1q42.13          | 228337553 | Amp                 | 0,34                 | 0.8 [ 0.4 ; 1.5 ] | 0,18                     | 1.00                           |
| <i>TERT</i>                   | 5p15.33          | 1253262   | Amp                 | <b>&lt;0.0001</b>    | 2.6 [ 1.6 ; 4.0 ] | <b>&lt;0.001</b>         | <b>0.01</b>                    |
| <i>RAD21</i>                  | 8q24.11          | 117858174 | Amp                 | <b>0,03</b>          | 1.4 [ 0.9 ; 2.0 ] | 0,07                     | 1.00                           |
| <i>ST3GAL1 (NDRG1/WISP1)</i>  | 8q24.22          | 134467091 | Amp                 | 0,67                 | 0.6 [ 0.4 ; 1.0 ] | 0,52                     | 1.00                           |
| <i>SOCS1</i>                  | 16p13.13         | 11348262  | Amp                 | 0,58                 | 0.8 [ 0.4 ; 1.6 ] | 0,26                     | 1.00                           |

<sup>a</sup> : Amp : Focal amplification; Del : Homozygous deletion

<sup>b</sup> : p-values in bold are significant

Supplementary Table 5. Genomic regions with prognostic effect of copy number alterations in the ER+/HER2- eBC population.

| Gene(s)                       | Chromosomal band | Location  | Status <sup>a</sup> | Univariate (OS)      |                   | Multivariate (OS)        |                   |
|-------------------------------|------------------|-----------|---------------------|----------------------|-------------------|--------------------------|-------------------|
|                               |                  |           |                     | p-value <sup>b</sup> | HR (95% CI)       | Raw p-value <sup>b</sup> | Corrected p-value |
| <i>TRIM46</i>                 | 1q22             | 155145873 | Amp                 | 0,38                 | 1.1 [ 0.7 ; 1.8 ] | 0,38                     | 1,00              |
| <i>FASLG (TNFSF18/TNFSF4)</i> | 1q24.3           | 172628154 | Amp                 | 0,47                 | 1.2 [ 0.6 ; 2.2 ] | 0,39                     | 1,00              |
| <i>ZNF703 (FGFR1)</i>         | 8p11.23          | 37553269  | Amp                 | 0,20                 | 1.1 [ 0.9 ; 1.4 ] | 0,35                     | 1,00              |
| <i>MYC</i>                    | 8q24.21          | 128747680 | Amp                 | 0,28                 | 1.2 [ 0.8 ; 1.9 ] | 0,61                     | 1,00              |
| <i>SEPHS1</i>                 | 10p13            | 13359424  | Amp                 | 0,65                 | 1.0 [ 0.4 ; 2.5 ] | 0,21                     | 1,00              |
| <i>POLD4</i>                  | 11q13.2          | 67118248  | Amp                 | 0,74                 | 0.9 [ 0.6 ; 1.3 ] | 0,49                     | 1,00              |
| <i>CCND1</i>                  | 11q13.3          | 69455855  | Amp                 | 0,37                 | 1.2 [ 0.9 ; 1.5 ] | 0,58                     | 1,00              |
| <i>NDUFC2-KCTD14</i>          | 11q14.1          | 77728017  | Amp                 | 0,81                 | 0.8 [ 0.5 ; 1.2 ] | 0,88                     | 1,00              |
| <i>RPS6KB1</i>                | 17q23.1          | 57970447  | Amp                 | 0,45                 | 0.7 [ 0.4 ; 1.0 ] | <b>0,05</b>              | 1,00              |
| <i>BIRC5</i>                  | 17q25.3          | 76210267  | Amp                 | 0,33                 | 1.3 [ 0.7 ; 2.2 ] | 0,65                     | 1,00              |
| <i>SEMG1</i>                  | 20q13.12         | 43835638  | Amp                 | 0,51                 | 0.8 [ 0.4 ; 1.8 ] | <b>&lt;0.01</b>          | 0,20              |
| <i>ZNF217</i>                 | 20q13.2          | 52183604  | Amp                 | 0,49                 | 1.0 [ 0.7 ; 1.6 ] | 0,11                     | 1,00              |
| <i>CDKN2A</i>                 | 9p21.3           | 21967751  | Del                 | <b>&lt;0.01</b>      | 2.0 [ 1.1 ; 3.6 ] | <b>0,02</b>              | 0,42              |
| <i>PTEN</i>                   | 10q23.31         | 89622870  | Del                 | <b>0,02</b>          | 1.5 [ 0.9 ; 2.6 ] | <b>0,03</b>              | 0,63              |
| <i>GJC2</i>                   | 1q42.13          | 228337553 | Amp                 | <b>&lt;0.01</b>      | 2.7 [ 1.4 ; 5.2 ] | <b>0,02</b>              | 0,42              |
| <i>TERT</i>                   | 5p15.33          | 1253262   | Amp                 | 0,13                 | 1.5 [ 0.8 ; 2.6 ] | 0,46                     | 1,00              |
| <i>RAD21</i>                  | 8q24.11          | 117858174 | Amp                 | 0,70                 | 1.0 [ 0.6 ; 1.6 ] | 0,14                     | 1,00              |
| <i>ST3GAL1 (NDRG1/WISP1)</i>  | 8q24.22          | 134467091 | Amp                 | 0,27                 | NA                | 0,09                     | 1,00              |
| <i>SOCS1</i>                  | 16p13.13         | 11348262  | Amp                 | 0,29                 | 0.6 [ 0.3 ; 1.5 ] | <b>0,03</b>              | 0,53              |

<sup>a</sup> : Amp : Focal amplification; Del : Homozygous deletion

<sup>b</sup> : p-values in bold are significant

NA: Not Applicable.

Supplementary Table 6. Known candidate genomic alterations in the TNBC populations.

| Gene(s)                       | Chromosomal band | Location  | Status <sup>a</sup> | mBC (n = 361)  | TCGA (n = 165) |                          | Metabric (n = 306) |                          |
|-------------------------------|------------------|-----------|---------------------|----------------|----------------|--------------------------|--------------------|--------------------------|
|                               |                  |           |                     | % <sup>b</sup> | % <sup>b</sup> | Raw p-value <sup>c</sup> | % <sup>b</sup>     | Raw p-value <sup>c</sup> |
| <i>DLEU2L</i>                 | 1p31.3           | 64014588  | amp                 | 0,8            | 0,0            | 5,82E-01                 | 1,6                | 5,54E-01                 |
| <b><i>TRIM46</i></b>          | 1q22             | 155145873 | amp                 | 15,2           | 13,3           | 6,60E-01                 | 8,2                | <b>7,38E-03</b>          |
| <i>FASLG (TNFSF18/TNFSF4)</i> | 1q24.3           | 172628154 | amp                 | 5,0            | 3,0            | 4,31E-01                 | 3,3                | 3,63E-01                 |
| <i>KDM5B</i>                  | 1q32.1           | 202696526 | amp                 | 4,2            | 2,4            | 4,62E-01                 | 2,0                | 1,63E-01                 |
| <i>RAB7L1</i>                 | 1q32.1           | 205737114 | amp                 | 5,3            | 3,6            | 5,53E-01                 | 3,6                | 3,96E-01                 |
| <i>PFN2</i>                   | 3q25.1           | 149682691 | amp                 | 3,0            | 0,6            | 1,54E-01                 | 2,3                | 7,16E-01                 |
| <i>PIK3CA</i>                 | 3q26.32          | 178865902 | amp                 | 3,0            | 2,4            | 9,08E-01                 | 2,9                | 1,00E+00                 |
| <i>EREG</i>                   | 4q13.3           | 75230860  | amp                 | 1,7            | 0,0            | 2,21E-01                 | 1,3                | 9,55E-01                 |
| <i>AIM1</i>                   | 6q21             | 106959730 | amp                 | 6,9            | 3,6            | 1,98E-01                 | 3,6                | 8,46E-02                 |
| <i>EGFR</i>                   | 7p11.2           | 55086714  | amp                 | 3,0            | 3,0            | 1,00E+00                 | 3,3                | 1,00E+00                 |
| <i>ZNF703 (FGFR1)</i>         | 8p11.23          | 37553269  | amp                 | 4,7            | 9,1            | 7,94E-02                 | 5,2                | 8,97E-01                 |
| <b><i>MYC</i></b>             | 8q24.21          | 128747680 | amp                 | 16,3           | 12,1           | 2,60E-01                 | 6,9                | <b>2,77E-04</b>          |
| <i>SEPHS1</i>                 | 10p13            | 13359424  | amp                 | 5,0            | 2,4            | 2,60E-01                 | 5,2                | 1,00E+00                 |
| <i>ZMIZ1</i>                  | 10q22.3          | 80828792  | amp                 | 6,4            | 2,4            | 9,09E-02                 | 3,9                | 2,15E-01                 |
| <i>EHF</i>                    | 11p13            | 34642640  | amp                 | 7,5            | 3,6            | 1,36E-01                 | 5,2                | 3,07E-01                 |
| <i>POLD4</i>                  | 11q13.2          | 67118248  | amp                 | 1,7            | 2,4            | 8,03E-01                 | 2,3                | 7,63E-01                 |
| <i>CCND1</i>                  | 11q13.3          | 69455855  | amp                 | 7,5            | 4,2            | 2,26E-01                 | 4,2                | 1,12E-01                 |
| <i>P2RY2</i>                  | 11q13.4          | 72929343  | amp                 | 0,8            | 3,0            | 1,26E-01                 | 2,0                | 3,56E-01                 |
| <i>NDUFC2-KCTD14</i>          | 11q14.1          | 77728017  | amp                 | 3,0            | 1,8            | 6,03E-01                 | 2,9                | 1,00E+00                 |
| <i>FOXM1</i>                  | 12p13.33         | 2966847   | amp                 | 7,8            | 7,3            | 9,87E-01                 | 8,8                | 7,20E-01                 |
| <i>MDM2</i>                   | 12q15            | 69201956  | amp                 | 1,1            | 1,8            | 8,03E-01                 | 2,3                | 3,75E-01                 |
| <i>STOML3</i>                 | 13q13.3          | 39540062  | amp                 | 0,8            | 0,0            | 5,82E-01                 | 0,7                | 1,00E+00                 |
| <i>NEMF</i>                   | 14q21.3          | 50249997  | amp                 | 1,1            | 0,6            | 9,47E-01                 | 1,0                | 1,00E+00                 |
| <i>IGF1R</i>                  | 15q26.3          | 99192200  | amp                 | 1,9            | 1,2            | 8,15E-01                 | 1,6                | 9,98E-01                 |
| <i>TP53I13</i>                | 17q11.2          | 27893070  | amp                 | 1,1            | 0,6            | 9,47E-01                 | 1,6                | 8,03E-01                 |
| <i>ERBB2</i>                  | 17q12            | 37844167  | amp                 | 0,6            | 0,0            | 8,46E-01                 | 0,0                | 5,53E-01                 |
| <i>SGCA</i>                   | 17q21.33         | 48241575  | amp                 | 0,8            | 0,6            | 1,00E+00                 | 1,0                | 1,00E+00                 |
| <i>RPS6KB1</i>                | 17q23.1          | 57970447  | amp                 | 1,7            | 3,0            | 4,91E-01                 | 2,0                | 1,00E+00                 |
| <i>BIRC5</i>                  | 17q25.3          | 76210267  | amp                 | 3,0            | 3,0            | 1,00E+00                 | 2,0                | 5,22E-01                 |
| <i>NOTCH3</i>                 | 19p13.12         | 15270444  | amp                 | 2,5            | 3,6            | 6,54E-01                 | 3,6                | 5,46E-01                 |
| <b><i>CCNE1</i></b>           | 19q12            | 30302805  | amp                 | 10,8           | 9,1            | 6,56E-01                 | 5,9                | <b>3,35E-02</b>          |
| <i>RCN3</i>                   | 19q13.33         | 50030875  | amp                 | 0,8            | 1,2            | 1,00E+00                 | 1,0                | 1,00E+00                 |
| <i>SEMG1</i>                  | 20q13.12         | 43835638  | amp                 | 2,8            | 1,2            | 4,26E-01                 | 0,7                | 7,89E-02                 |
| <i>ZNF217</i>                 | 20q13.2          | 52183604  | amp                 | 3,9            | 1,8            | 3,30E-01                 | 2,6                | 4,88E-01                 |
| <i>TPD52L2</i>                | 20q13.33         | 62496596  | amp                 | 4,7            | 3,6            | 7,43E-01                 | 4,6                | 1,00E+00                 |
| <i>PCNT</i>                   | 21q22.3          | 47744036  | amp                 | 5,0            | 4,2            | 8,80E-01                 | 2,6                | 1,69E-01                 |
| <i>CDKN2AIP</i>               | 4q35.1           | 184365744 | del                 | 0,0            | 1,2            | 1,83E-01                 | 0,0                | NA                       |
| <i>LZTS1</i>                  | 8p21.3           | 20103676  | del                 | 0,6            | 1,8            | 3,67E-01                 | 1,0                | 8,53E-01                 |
| <i>PPP2R2A</i>                | 8p21.2           | 26149007  | del                 | 1,9            | 1,2            | 8,15E-01                 | 1,3                | 7,39E-01                 |
| <b><i>CDKN2A</i></b>          | 9p21.3           | 21967751  | del                 | 7,2            | 4,2            | 2,69E-01                 | 2,6                | <b>1,22E-02</b>          |
| <b><i>PTEN</i></b>            | 10q23.31         | 89622870  | del                 | 9,7            | 7,9            | 6,11E-01                 | 2,9                | <b>8,22E-04</b>          |
| <b><i>RB1</i></b>             | 13q14.2          | 48877887  | del                 | 6,4            | 3,6            | 2,85E-01                 | 1,6                | <b>4,42E-03</b>          |
| <i>CAPN3</i>                  | 15q15.1          | 42640301  | del                 | 0,6            | 1,2            | 7,91E-01                 | 0,3                | 1,00E+00                 |
| <i>CDH1</i>                   | 16q22.1          | 68771128  | del                 | 0,3            | 0,6            | 1,00E+00                 | 0,7                | 8,86E-01                 |
| <i>MAP2K4</i>                 | 17p12            | 11924141  | del                 | 0,8            | 2,4            | 2,85E-01                 | 1,6                | 5,54E-01                 |

<sup>a</sup> : Amp : Focal amplification; Del : Homozygous deletion

<sup>b</sup> : Percentage of genomic alterations

<sup>c</sup> : Chi-squared test : TCGA (or Metabric) versus mBC ; genes and p-values in bold are significant

NA: Not Applicable. Frequencies at 0% in both populations (mBC and Metabric)

Supplementary Table 7. Genomic regions with prognostic effect of copy number alterations in the TNBC mBC population.

| Gene(s)                 | Chromosomal band | Location | Status <sup>a</sup> | mBC (n = 361)<br>% <sup>b</sup> | TCGA (n = 165) |                          | Metabric (n = 306) |                          | Univariate (OS) |                   | Multivariate (OS) |                   |
|-------------------------|------------------|----------|---------------------|---------------------------------|----------------|--------------------------|--------------------|--------------------------|-----------------|-------------------|-------------------|-------------------|
|                         |                  |          |                     |                                 | % <sup>b</sup> | Raw p-value <sup>c</sup> | % <sup>b</sup>     | Raw p-value <sup>c</sup> | P-value         | HR (95% CI)       | Raw p-value       | Corrected p-value |
| <i>NFIB (LINCO0583)</i> | 9p23             | 14081842 | Amp                 | 9,1                             | 4,2            | <b>7,35E-02</b>          | 5                  | <b>4,99E-02</b>          | 0,93            | 0.9 [ 0.4 ; 1.9 ] | 6,20E-01          | 1,00              |
| <i>GPC5</i>             | 13q31.3          | 92050929 | Del                 | 5,3                             | 0,6            | <b>1,90E-02</b>          | 0,3                | <b>5,00E-04</b>          | 0,45            | 1.9 [ 0.4 ; 7.9 ] | 4,10E-01          | 0,82              |

<sup>a</sup>: Amp : Focal amplification; Del : Homozygous deletion

<sup>b</sup>: Percentage of genomic alterations

<sup>c</sup>: Chi-squared test: TCGA (or Metabric) *versus* mBC; p-values in bold are significant

Supplementary Table 8. Known candidate genomic alterations in ER+/HER2- mBC in comparison with mTNBC.

| Gene(s)                       | Chromosomal band | Location  | Status <sup>a</sup> | ER+/HER2- mBC<br>(n = 565) | mTNBC (n = 361) | Raw p-value <sup>c</sup> | Corrected p-value |
|-------------------------------|------------------|-----------|---------------------|----------------------------|-----------------|--------------------------|-------------------|
|                               |                  |           |                     | % <sup>b</sup>             | % <sup>b</sup>  |                          |                   |
| <i>DLEU2L</i>                 | 1p31.3           | 64014588  | amp                 | 0,2                        | 0,8             | 3,34E-01                 | 7,64E-01          |
| <i>TRIM46</i>                 | 1q22             | 155145873 | amp                 | 6,5                        | <b>15,2</b>     | <b>2,70E-05</b>          | <b>1,28E-03</b>   |
| <i>FASLG (TNFSF18/TNFSF4)</i> | 1q24.3           | 172628154 | amp                 | 4,6                        | 5,0             | 9,13E-01                 | 1,00E+00          |
| <i>KDM5B</i>                  | 1q32.1           | 202696526 | amp                 | 4,2                        | 4,2             | 1,00E+00                 | 1,00E+00          |
| <i>RAB7L1</i>                 | 1q32.1           | 205737114 | amp                 | 5,5                        | 5,3             | 1,00E+00                 | 1,00E+00          |
| <i>PFN2</i>                   | 3q25.1           | 149682691 | amp                 | 1,8                        | 3,0             | 2,95E-01                 | 7,58E-01          |
| <i>PIK3CA</i>                 | 3q26.32          | 178865902 | amp                 | 2,3                        | 3,0             | 6,28E-01                 | 1,00E+00          |
| <i>EREG</i>                   | 4q13.3           | 75230860  | amp                 | 1,4                        | 1,7             | 9,81E-01                 | 1,00E+00          |
| <i>AIM1</i>                   | 6q21             | 106959730 | amp                 | 2,5                        | <b>6,9</b>      | <b>1,82E-03</b>          | <b>2,78E-02</b>   |
| <i>EGFR</i>                   | 7p11.2           | 55086714  | amp                 | 1,1                        | 3,0             | 5,19E-02                 | 2,69E-01          |
| <i>ZNF703 (FGFR1)</i>         | 8p11.23          | 37553269  | amp                 | <b>24,6</b>                | 4,7             | <b>6,29E-15</b>          | <b>2,06E-11</b>   |
| <i>MYC</i>                    | 8q24.21          | 128747680 | amp                 | 13,3                       | 16,3            | 2,31E-01                 | 6,86E-01          |
| <i>SEPHS1</i>                 | 10p13            | 13359424  | amp                 | 3,2                        | 5,0             | 2,27E-01                 | 6,76E-01          |
| <i>ZMIZ1</i>                  | 10q22.3          | 80828792  | amp                 | 2,3                        | <b>6,4</b>      | <b>3,17E-03</b>          | <b>4,24E-02</b>   |
| <i>EHF</i>                    | 11p13            | 34642640  | amp                 | 2,8                        | <b>7,5</b>      | <b>1,82E-03</b>          | <b>2,78E-02</b>   |
| <i>POLD4</i>                  | 11q13.2          | 67118248  | amp                 | <b>8,8</b>                 | 1,7             | <b>1,47E-05</b>          | <b>8,55E-04</b>   |
| <i>CCND1</i>                  | 11q13.3          | 69455855  | amp                 | <b>30,1</b>                | 7,5             | <b>4,78E-16</b>          | <b>4,70E-12</b>   |
| <i>P2RY2</i>                  | 11q13.4          | 72929343  | amp                 | <b>5,7</b>                 | 0,8             | <b>3,38E-04</b>          | <b>8,68E-03</b>   |
| <i>NDUFC2-KCTD14</i>          | 11q14.1          | 77728017  | amp                 | <b>13,6</b>                | 3,0             | <b>1,61E-07</b>          | <b>2,98E-05</b>   |
| <i>FOXO1</i>                  | 12p13.33         | 2966847   | amp                 | 2,7                        | <b>7,8</b>      | <b>5,86E-04</b>          | <b>1,31E-02</b>   |
| <i>MDM2</i>                   | 12q15            | 69201956  | amp                 | <b>5,8</b>                 | 1,1             | <b>6,40E-04</b>          | <b>1,40E-02</b>   |
| <i>STOML3</i>                 | 13q13.3          | 39540062  | amp                 | 0,0                        | 0,8             | 1,15E-01                 | 4,44E-01          |
| <i>NEMF</i>                   | 14q21.3          | 50249997  | amp                 | 3,0                        | 1,1             | 9,52E-02                 | 3,91E-01          |
| <i>IGF1R</i>                  | 15q26.3          | 99192200  | amp                 | 1,6                        | 1,9             | 8,92E-01                 | 1,00E+00          |
| <i>TP53I13</i>                | 17q11.2          | 27893070  | amp                 | 3,7                        | 1,1             | <b>2,92E-02</b>          | 1,89E-01          |
| <i>ERBB2</i>                  | 17q12            | 37844167  | amp                 | 1,6                        | 0,6             | 2,66E-01                 | 7,58E-01          |
| <i>SGCA</i>                   | 17q21.33         | 48241575  | amp                 | <b>5,8</b>                 | 0,8             | <b>2,41E-04</b>          | <b>6,71E-03</b>   |
| <i>RPS6KB1</i>                | 17q23.1          | 57970447  | amp                 | <b>9,4</b>                 | 1,7             | <b>5,31E-06</b>          | <b>3,89E-04</b>   |
| <i>BIRC5</i>                  | 17q25.3          | 76210267  | amp                 | 5,1                        | 3,0             | 1,75E-01                 | 5,54E-01          |
| <i>NOTCH3</i>                 | 19p13.12         | 15270444  | amp                 | 1,2                        | 2,5             | 2,42E-01                 | 7,06E-01          |
| <i>CCNE1</i>                  | 19q12            | 30302805  | amp                 | 1,9                        | <b>10,8</b>     | <b>1,46E-08</b>          | <b>5,02E-06</b>   |
| <i>RCN3</i>                   | 19q13.33         | 50030875  | amp                 | 1,4                        | 0,8             | 6,24E-01                 | 1,00E+00          |
| <i>SEMG1</i>                  | 20q13.12         | 43835638  | amp                 | 5,0                        | 2,8             | 1,43E-01                 | 5,28E-01          |
| <i>ZNF217</i>                 | 20q13.2          | 52183604  | amp                 | <b>10,4</b>                | 3,9             | <b>4,83E-04</b>          | <b>1,15E-02</b>   |
| <i>TPD52L2</i>                | 20q13.33         | 62496596  | amp                 | 7,8                        | 4,7             | 8,80E-02                 | 3,83E-01          |
| <i>PCNT</i>                   | 21q22.3          | 47744036  | amp                 | 1,8                        | 5,0             | <b>9,58E-03</b>          | 8,77E-02          |
| <i>CDKN2AIP</i>               | 4q35.1           | 184365744 | del                 | 0,0                        | 0,0             | 2,76E-01                 | 7,58E-01          |
| <i>LZTS1</i>                  | 8p21.3           | 20103676  | del                 | 0,4                        | 0,6             | 1,00E+00                 | 1,00E+00          |
| <i>PPP2R2A</i>                | 8p21.2           | 26149007  | del                 | 0,4                        | 1,9             | 8,21E-01                 | 1,00E+00          |
| <i>CDKN2A</i>                 | 9p21.3           | 21967751  | del                 | 6,4                        | 7,2             | <b>5,37E-03</b>          | 6,11E-02          |
| <i>PTEN</i>                   | 10q23.31         | 89622870  | del                 | 4,2                        | 9,7             | 2,96E-01                 | 7,58E-01          |
| <i>RB1</i>                    | 13q14.2          | 48877887  | del                 | 2,1                        | 6,4             | 8,21E-01                 | 1,00E+00          |
| <i>CAPN3</i>                  | 15q15.1          | 42640301  | del                 | 0,0                        | 0,6             | 9,51E-01                 | 1,00E+00          |
| <i>CDH1</i>                   | 16q22.1          | 68771128  | del                 | 1,2                        | 0,3             | 6,95E-01                 | 1,00E+00          |
| <i>MAP2K4</i>                 | 17p12            | 11924141  | del                 | 5,1                        | 0,8             | 1,00E+00                 | 1,00E+00          |

<sup>a</sup> : Amp : Focal amplification; Del : Homozygous deletion

<sup>b</sup> : Percentage of genomic alterations; values in bold correspond to genes statistically more amplified with corrected pvalue

<sup>c</sup> : Chi-squared test : mTNBC versus ER+/HER2- mBC; p-values in bold are significant



Supplementary Table 9. New specific genomic alterations in the ER-/HER2- mBC or mTNBC population

| Gene(s)                                                      | Chromosomal band | Location  | Status <sup>a</sup> | ER+/HER2- mBC<br>(n = 565)<br>% <sup>b</sup> | mTNBC<br>(n = 361)<br>% <sup>b</sup> | Raw p-value <sup>c</sup> |
|--------------------------------------------------------------|------------------|-----------|---------------------|----------------------------------------------|--------------------------------------|--------------------------|
| <b>New specific genomic alterations in the mTNBC</b>         |                  |           |                     |                                              |                                      |                          |
| <i>ANGPTL1 (ABL2)</i>                                        | 1q25.2           | 178818840 | Amp                 | 3,2                                          | 8,8                                  | <b>3,49E-04</b>          |
| <i>TFEB (APOBEC2)</i>                                        | 6p21.1           | 41651716  | Amp                 | 0,7                                          | 4,7                                  | <b>1,68E-04</b>          |
| <i>NFKBIE (VEGFA)</i>                                        | 6p21.1           | 44225903  | Amp                 | 0,5                                          | 4,4                                  | <b>1,20E-04</b>          |
| <i>RAB23 (BMP5)</i>                                          | 6p11.2           | 57053607  | Amp                 | 0,9                                          | 4,2                                  | <b>1,89E-03</b>          |
| <i>CYP3A4</i>                                                | 7q22.1           | 99354604  | Amp                 | 0,4                                          | 3,6                                  | <b>3,84E-04</b>          |
| <i>AKR1B10</i>                                               | 7q33             | 134212344 | Amp                 | 0,4                                          | 3,9                                  | <b>1,73E-04</b>          |
| <i>ASB13</i>                                                 | 10p15.1          | 5680830   | Amp                 | 3,2                                          | 8,9                                  | <b>3,44E-04</b>          |
| <b>New specific genomic alterations in the ER+/HER2- mBC</b> |                  |           |                     |                                              |                                      |                          |
| <i>NFKBIA</i>                                                | 14q13.2          | 35870717  | Amp                 | 4,2                                          | 0,3                                  | <b>6,08E-04</b>          |
| <i>TRAF7 (NAGPA)</i>                                         | 16p13.3          | 2205699   | Amp                 | 5,3                                          | 0,6                                  | <b>2,33E-04</b>          |

<sup>a</sup>: Amp : Focal amplification

<sup>b</sup>: Percentage of genomic alterations

<sup>c</sup>: Chi-squared test : mTNBC versus ER+/HER2- mBC ; p-values in bold are significant

Supplementary Table 10. Known candidates genomic alterations in the ER+/HER2- population by CDK4 inhibitor before biopsies collection.

| Gene(s)                | Chromosomal band | Location  | Status <sup>a</sup> | non pre-treated mBC (n = 323) | pre-treated mBC (n = 102) | Raw p-value <sup>c</sup> |
|------------------------|------------------|-----------|---------------------|-------------------------------|---------------------------|--------------------------|
|                        |                  |           |                     | % <sup>b</sup>                | % <sup>b</sup>            |                          |
| DLEU2L                 | 1p31.3           | 64014588  | amp                 | 0.3                           | 0.0                       | 1.00E+00                 |
| TRIM46                 | 1q22             | 155145873 | amp                 | 8.7                           | 4.9                       | 3.04E-01                 |
| FASLG (TNFSF18/TNFSF4) | 1q24.3           | 172628154 | amp                 | 5.9                           | 5.9                       | 1.00E+00                 |
| KDM5B                  | 1q32.1           | 202696526 | amp                 | 5.3                           | 3.9                       | 7.77E-01                 |
| RAB7L1                 | 1q32.1           | 205737114 | amp                 | 5.9                           | 8.8                       | 4.15E-01                 |
| PFN2                   | 3q25.1           | 149682691 | amp                 | 2.5                           | 1.0                       | 6.03E-01                 |
| PIK3CA                 | 3q26.32          | 178865902 | amp                 | 2.2                           | 2.9                       | 9.40E-01                 |
| EREG                   | 4q13.3           | 75230860  | amp                 | 1.5                           | 2.0                       | 1.00E+00                 |
| AIM1                   | 6q21             | 106959730 | amp                 | 1.9                           | 4.9                       | 1.83E-01                 |
| EGFR                   | 7p11.2           | 55086714  | amp                 | 1.2                           | 1.0                       | 1.00E+00                 |
| ZNF703 (FGFR1)         | 8p11.23          | 37553269  | amp                 | 25.1                          | 31.4                      | 2.60E-01                 |
| MYC                    | 8q24.21          | 128747680 | amp                 | 13.0                          | 16.7                      | 4.42E-01                 |
| SEPHS1                 | 10p13            | 13359424  | amp                 | 3.7                           | 3.9                       | 1.00E+00                 |
| ZMI21                  | 10q22.3          | 80828792  | amp                 | 1.5                           | 6.9                       | <b>1.31E-02</b>          |
| EHF                    | 11p13            | 34642640  | amp                 | 2.8                           | 3.9                       | 8.02E-01                 |
| POLD4                  | 11q13.2          | 67118248  | amp                 | 10.5                          | 8.8                       | 7.57E-01                 |
| CCND1                  | 11q13.3          | 69455855  | amp                 | 30.0                          | 29.4                      | 1.00E+00                 |
| P2RY2                  | 11q13.4          | 72929343  | amp                 | 4.6                           | 8.8                       | 1.78E-01                 |
| NDUFC2-KCTD14          | 11q14.1          | 77728017  | amp                 | 13.6                          | 12.7                      | 9.52E-01                 |
| FOXM1                  | 12p13.33         | 2966847   | amp                 | 1.2                           | 6.9                       | <b>5.76E-03</b>          |
| MDM2                   | 12q15            | 69201956  | amp                 | 5.3                           | 10.8                      | 8.35E-02                 |
| STOML3                 | 13q13.3          | 39540062  | amp                 | 0.0                           | 0.0                       | NA                       |
| NEMF                   | 14q21.3          | 50249997  | amp                 | 4.0                           | 2.0                       | 4.98E-01                 |
| IGF1R                  | 15q26.3          | 99192200  | amp                 | 1.2                           | 2.0                       | 9.54E-01                 |
| TP53I13                | 17q11.2          | 27893070  | amp                 | 3.1                           | 3.9                       | 9.29E-01                 |
| ERBB2                  | 17q12            | 37844167  | amp                 | 2.2                           | 2.0                       | 1.00E+00                 |
| SGCA                   | 17q21.33         | 48241575  | amp                 | 6.2                           | 6.9                       | 9.93E-01                 |
| RPS6KB1                | 17q23.1          | 57970447  | amp                 | 9.3                           | 10.8                      | 8.00E-01                 |
| BIRC5                  | 17q25.3          | 76210267  | amp                 | 4.6                           | 7.8                       | 3.20E-01                 |
| NOTCH3                 | 19p13.12         | 15270444  | amp                 | 1.9                           | 0.0                       | 3.65E-01                 |
| CCNE1                  | 19q12            | 30302805  | amp                 | 2.2                           | 1.0                       | 7.26E-01                 |
| RCN3                   | 19q13.33         | 50030875  | amp                 | 1.9                           | 0.0                       | 3.65E-01                 |
| SEMG1                  | 20q13.12         | 43835638  | amp                 | 5.0                           | 8.8                       | 2.28E-01                 |
| ZNF217                 | 20q13.2          | 52183604  | amp                 | 10.8                          | 11.8                      | 9.36E-01                 |
| TPD52L2                | 20q13.33         | 62496596  | amp                 | 8.7                           | 9.8                       | 8.80E-01                 |
| PCNT                   | 21q22.3          | 47744036  | amp                 | 1.9                           | 2.9                       | 7.89E-01                 |
| CDKN2AIP               | 4q35.1           | 184365744 | del                 | 0.0                           | 0.0                       | NA                       |
| LZTS1                  | 8p21.3           | 20103676  | del                 | n                             | 0.0                       | NA                       |
| PPP2R2A                | 8p21.2           | 26149007  | del                 | 0.0                           | 0.0                       | NA                       |
| CDKN2A                 | 9p21.3           | 21967751  | del                 | 6.5                           | 2.9                       | 2.66E-01                 |
| PTEN                   | 10q23.31         | 89622870  | del                 | 3.7                           | 4.9                       | 8.08E-01                 |
| RB1                    | 13q14.2          | 48877887  | del                 | 1.9                           | 3.9                       | 4.10E-01                 |
| CAPN3                  | 15q15.1          | 42640301  | del                 | 0.0                           | 0.0                       | NA                       |
| CDH1                   | 16q22.1          | 68771128  | del                 | 1.9                           | 1.0                       | 8.72E-01                 |
| MAP2K4                 | 17p12            | 11924141  | del                 | 4.3                           | 5.9                       | 7.07E-01                 |

<sup>a</sup>: Amp : Focal amplification; Del : Homozygous deletion

<sup>b</sup>: Percentage of genomic alterations

<sup>c</sup>: Chi-squared test : CDK4i pretreated mBC versus CDK4i unpretreated mBC ; p-values in bold are significant

NA: Not Applicable. Frequencies at 0% in mBC population

Supplementary Table 11. Genomic regions with prognostic effect of copy number alterations in the not treated and treated by CDK4 inhibitor population before biopsies collection.

| Gene(s)          | Chromosomal band | Location | Status <sup>a</sup> | Non pre-treated      |                                      |                          |                   | Pre-treated          |                                      |                          |                   |
|------------------|------------------|----------|---------------------|----------------------|--------------------------------------|--------------------------|-------------------|----------------------|--------------------------------------|--------------------------|-------------------|
|                  |                  |          |                     | Univariate (OS)      |                                      | Multivariate (OS)        |                   | Univariate (OS)      |                                      | Multivariate (OS)        |                   |
|                  |                  |          |                     | P-value <sup>b</sup> | Overall survival (OS)<br>HR (95% CI) | Raw p-value <sup>b</sup> | Corrected p-value | P-value <sup>b</sup> | Overall survival (OS)<br>HR (95% CI) | Raw p-value <sup>b</sup> | Corrected p-value |
| <b>Candidate</b> |                  |          |                     |                      |                                      |                          |                   |                      |                                      |                          |                   |
| ZMIZ1            | 10q22.3          | 80828792 | Amp                 | 0.84                 | 1.2 [ 0.5 ; 2.8 ]                    | 0.22                     | 1                 | 0.68                 | 1.2 [ 0.3 ; 4.3 ]                    | 0.96                     | 1                 |
| FOXM1            | 12p13.33         | 2966847  | Amp                 | 0.11                 | 3.0 [ 0.9 ; 9.6 ]                    | 0.11                     | 1                 | 0.09                 | 1.9 [ 0.5 ; 7.5 ]                    | <b>0.04</b>              | 0.5               |
| <b>Discovery</b> |                  |          |                     |                      |                                      |                          |                   |                      |                                      |                          |                   |
| AGR2             | 7p21.1           | 16831435 | Amp                 | 0.44                 | 0.6 [ 0.1 ; 5.1 ]                    | 0.51                     | 1                 | 0.09                 | 0.2 [ 0.0 ; 1.7 ]                    | 0.37                     | 1                 |
| CPNE3 (MMP16)    | 8q21.3           | 87497059 | Amp                 | 0.66                 | 0.8 [ 0.4 ; 1.8 ]                    | 0.75                     | 1                 | 0.98                 | 0.7 [ 0.2 ; 2.1 ]                    | 0.73                     | 1                 |
| CDK4             | 12q14.1          | 58141510 | Amp                 | 0.48                 | 1.6 [ 0.5 ; 5.2 ]                    | 0.71                     | 1                 | 0.51                 | 1.5 [ 0.3 ; 7.1 ]                    | 0.29                     | 1                 |
| LGR5             | 12q21.1          | 71833550 | Amp                 | 0.82                 | 0.9 [ 0.4 ; 2.0 ]                    | 0.83                     | 1                 | 0.27                 | 1.7 [ 0.5 ; 5.4 ]                    | 0.51                     | 1                 |
| NFKBIA           | 14q13.2          | 35870717 | Amp                 | 0.62                 | 1.3 [ 0.5 ; 3.5 ]                    | 0.68                     | 1                 | 0.43                 | 0.5 [ 0.1 ; 2.0 ]                    | 0.27                     | 1                 |
| CCL1             | 17q12            | 32687347 | Amp                 | 0.72                 | 0.9 [ 0.2 ; 4.0 ]                    | 0.27                     | 1                 | 0.07                 | 2.0 [ 0.7 ; 6.1 ]                    | 0.19                     | 1                 |
| KCNG1            | 20q13.13         | 49620193 | Amp                 | 0.87                 | 0.9 [ 0.4 ; 1.8 ]                    | 0.74                     | 1                 | 0.84                 | 1.7 [ 0.5 ; 5.8 ]                    | 0.83                     | 1                 |

<sup>a</sup> : Amp : Focal amplification

<sup>b</sup> : p-values in bold are significant

Supplementary Table 12. Genomic regions with prognostic effect of copy number alterations in the not treated and treated by CDK4 inhibitor in ER+/HER2- eBC population before biopsies collection.

| Gene(s)          | Chromosomal band | Location  | Status <sup>a</sup> | Univariate (OS)      |                                      | Multivariate (OS)        |                   |
|------------------|------------------|-----------|---------------------|----------------------|--------------------------------------|--------------------------|-------------------|
|                  |                  |           |                     | P-value <sup>b</sup> | Overall survival (OS)<br>HR (95% CI) | Raw p-value <sup>b</sup> | Corrected p-value |
| <b>Candidate</b> |                  |           |                     |                      |                                      |                          |                   |
| ZMIZ1            | 10q22.3          | 80828792  | Amp                 | 0.68                 | 0.8 [ 0.4 ; 1.6 ]                    | 0.92                     | 1                 |
| FOXM1            | 12p13.33         | 2966847   | Amp                 | 0.51                 | 0.9 [ 0.5 ; 1.5 ]                    | 0.97                     | 1                 |
| <b>Discovery</b> |                  |           |                     |                      |                                      |                          |                   |
| NSL1 (ATF3)      | 1q32.3           | 212899495 | Amp                 | <b>&lt;0.01</b>      | 2.1 [ 1.2 ; 3.6 ]                    | 0.55                     | 1                 |
| AGR2             | 7p21.1           | 16831435  | Amp                 | 0.36                 | 0.6 [ 0.1 ; 2.5 ]                    | 0.49                     | 1                 |
| CPNE3 (MMP16)    | 8q21.3           | 87497059  | Amp                 | 0.24                 | 1.3 [ 0.8 ; 2.1 ]                    | 0.33                     | 1                 |
| CDK4             | 12q14.1          | 58141510  | Amp                 | <b>&lt;0.01</b>      | 2.0 [ 1.0 ; 4.2 ]                    | <b>0.03</b>              | 0.4               |
| LGR5             | 12q21.1          | 71833550  | Amp                 | 0.07                 | 1.4 [ 0.7 ; 2.5 ]                    | 0.24                     | 1                 |
| NFKBIA           | 14q13.2          | 35870717  | Amp                 | 1                    | 1.0 [ 0.4 ; 2.1 ]                    | 0.82                     | 1                 |
| CCL1             | 17q12            | 32687347  | Amp                 | 0.88                 | 0.7 [ 0.3 ; 1.9 ]                    | 1.00                     | 1                 |
| KCNG1            | 20q13.13         | 49620193  | Amp                 | 0.63                 | 0.9 [ 0.6 ; 1.5 ]                    | 0.05                     | 0.71              |

<sup>a</sup> : Amp : Focal amplification; Del : Homozygous deletion

<sup>b</sup> : p-values in bold are significant
